# Supplementary material for: Synthesis and optoelectronic properties of reduced graphene oxide/InP quantum dot hybrids
Source: Royal Society of Chemistry journal article supplement (doi:10.1039/c6ra22858e), 2016-01-01
Supplement: c6ra22858e1.pdf [file c6ra22858e1.pdf]

Supporting information

## Synthesis and optoelectronic properties of reduced graphene oxide/InP quantum dot hybrids

Guohua Jiang,<sup>ab</sup> Yanjie Su,<sup>\*a</sup> Ming Li,<sup>a</sup> Jing Hu,<sup>a</sup> Bo Zhao,<sup>\*b</sup> Zhi Yang,<sup>a</sup> and Hao Wei<sup>\*a</sup>

<sup>a</sup> Key Laboratory for Thin Film and Microfabrication of the Ministry of Education, Department of Micro/Nano Electronics, School of Electronics, Information and Electrical Engineering, Shanghai Jiao Tong University, Shanghai 200240, PR China. Email: yanjiesu@sjtu.edu.cn, haowei@sjtu.edu.cn.

<sup>b</sup> Jiangsu Key Laboratory of Advanced Laser Materials and Devices, School of Physics and Electronic Engineering, Jiangsu Normal University, Xuzhou 221116, PR China. Email: phyzhaobo@jsnu.edu.cn.

Figure S1

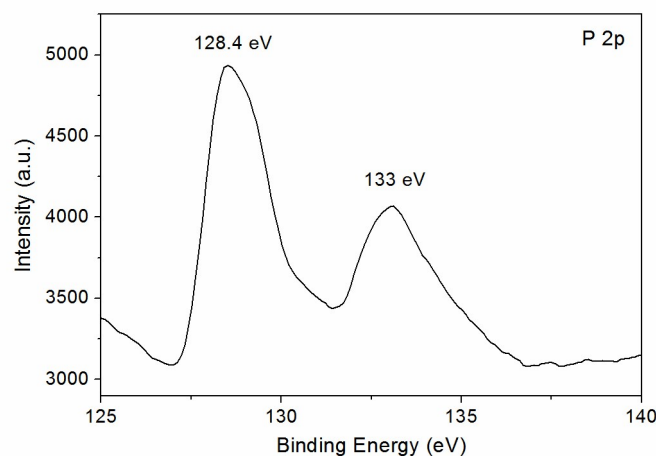

Figure S1. High resolution P<sub>2p</sub> XPS spectrum of the rGO/InP QD hybrids

Figure S2

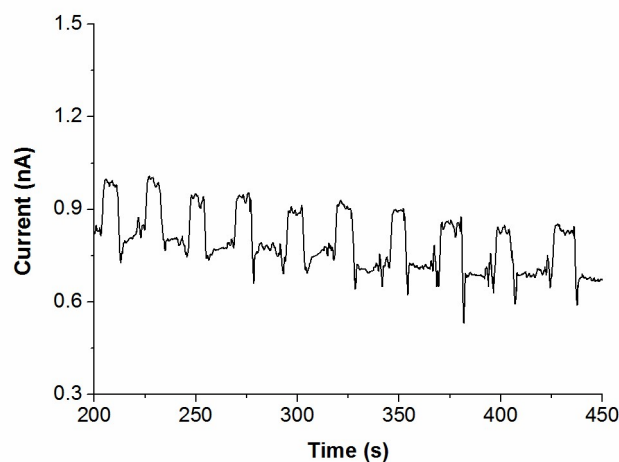

Figure S2. The current response of pure InP QDs versus time under intermittent blue light irradiation with a voltage of 1 V.
